# Supplementary material for: Electricity generation from digitally printed cyanobacteria
Source: PubMed Central journal article supplement (PMC5673893; doi:10.1038/s41467-017-01084-4), 2017-11-06
Supplement: 41467_2017_1084_MOESM1_ESM.pdf [file 41467_2017_1084_MOESM1_ESM.pdf]

## Supplementary Figure 1

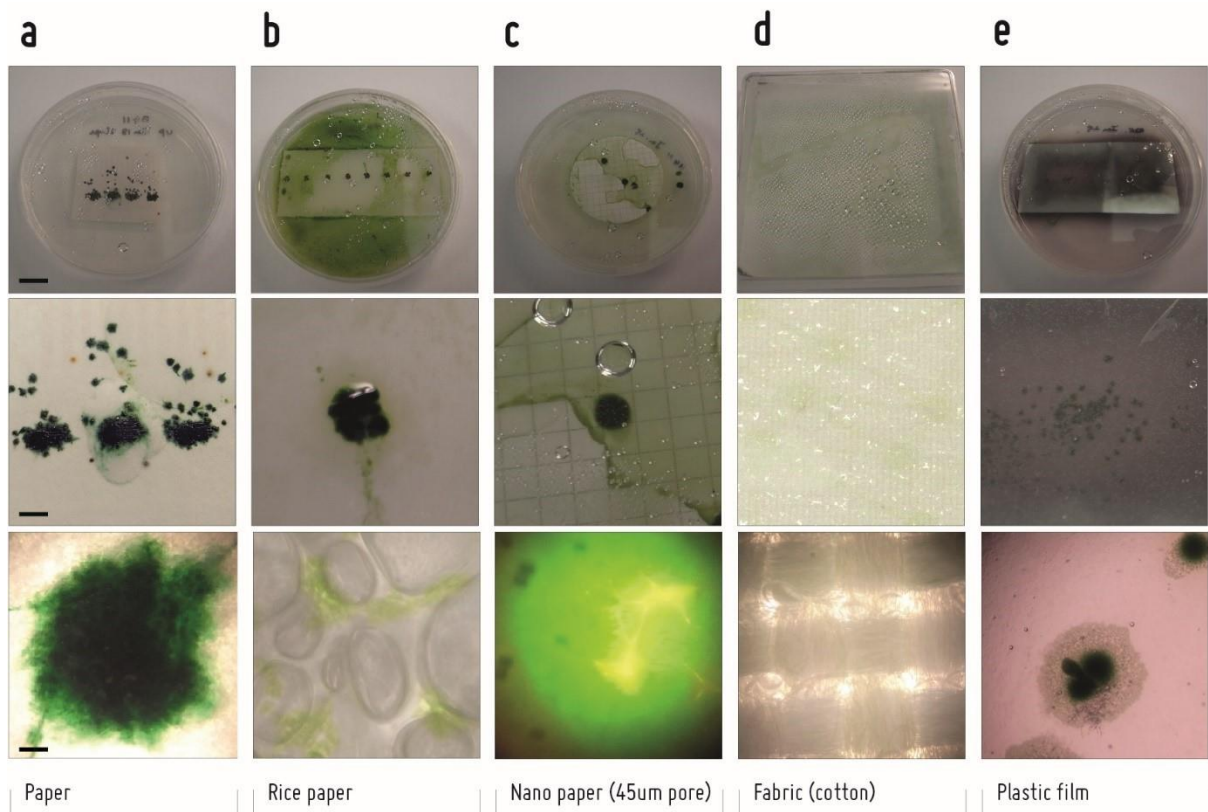

Testing biofilm growth of printed *Synechocystis* on various materials.

Photographic comparison of the growth of inkjet-printed *Synechocystis* (WT-G) on various inkjet-printable sheet substrates following 14 days of incubation: Copy paper (a), rice paper (b), nano paper (c), cotton fabric (d), and inkjet plastic film (e). There are three scale bars, one per row: from top, each measures 1 cm, 1 mm, and 100 μm respectively.

## Supplementary Figure 2

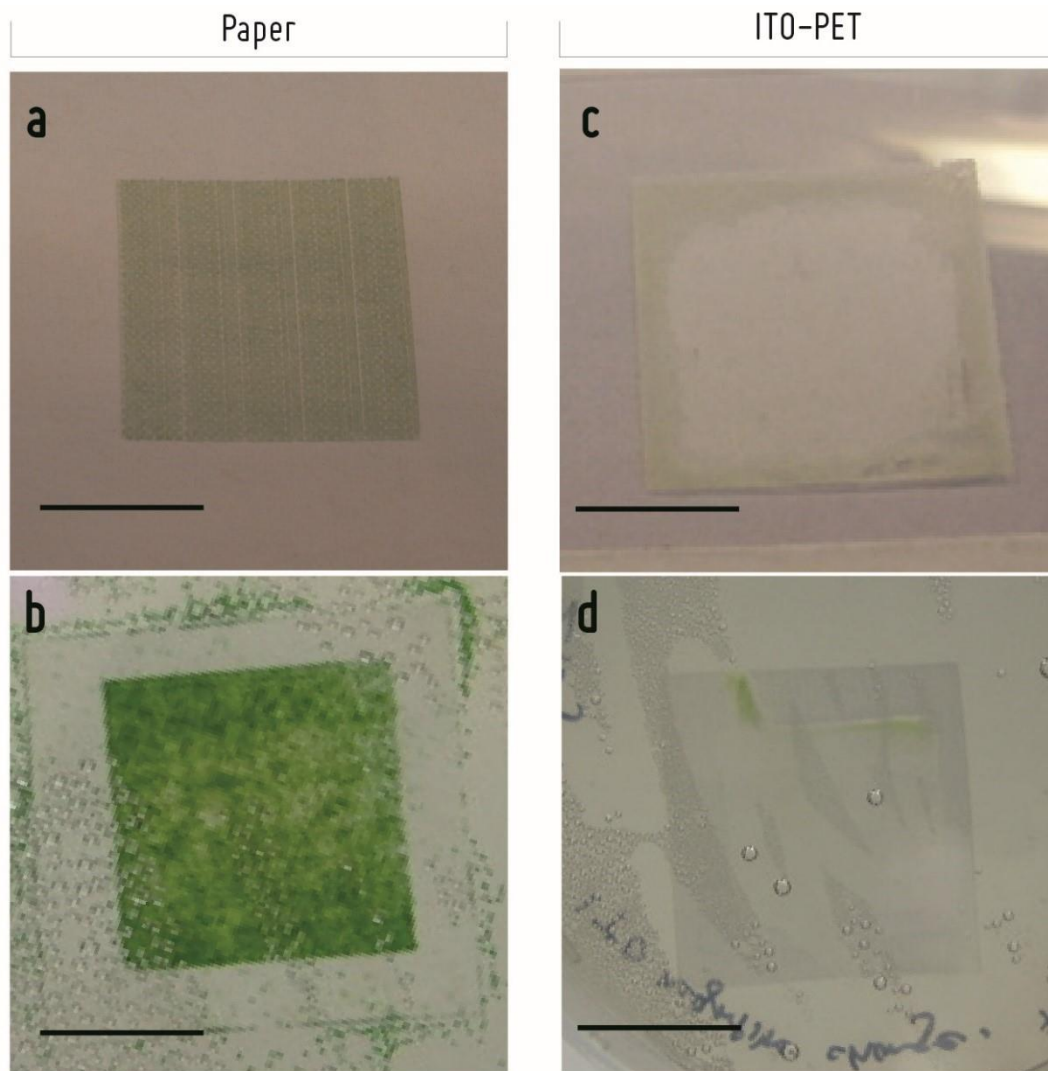

Comparison of the growth of printed *Synechocystis* cells on copy paper (a, b) and ITO-PET (c, d). Panels a and c show freshly printed cells and panels b and d the growth after 7 days of incubation on solid medium (BG-11, agar 1.5 % w/w). Each scale bar measures 1 cm.

## Supplementary Figure 3

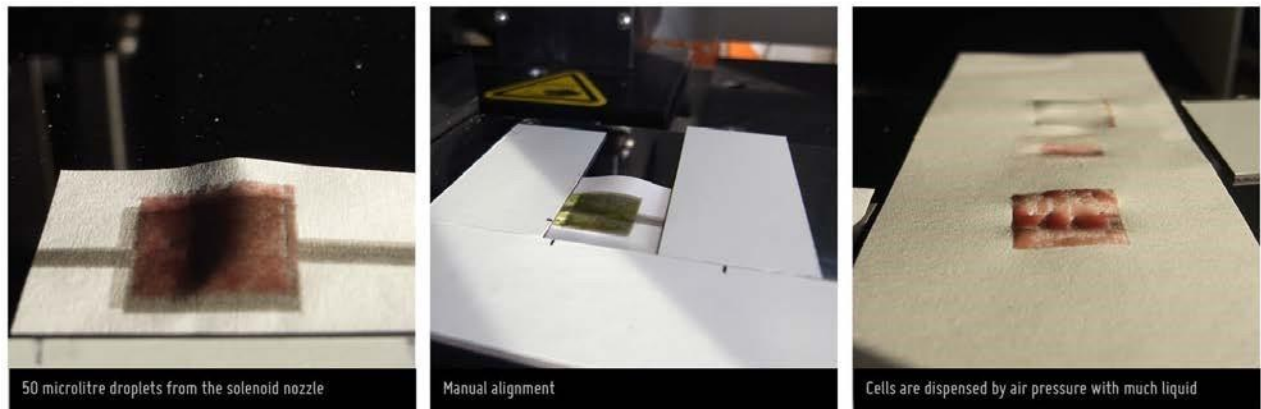

Inkjet printing of cyanobacteria using a research-grade microvalve-based cell printer. The cyanobacterium *Thermosynechococcus elongatus* BP-1 and red-pigmented cyanobacterium *Phormidium persicinum* PML 715 were printed using a Celljet (Cronus Technologies, UK). The pattern was programmed in the custom software to a basic 20 x 20 mm square. The far-left panel shows a *Phormidium* cell suspension dispensed onto paper from the solenoid nozzle with a droplet size 50 nanolitre, far larger than the 140 picolitre droplet size used in inkjet printing exploited in the present research; the middle panel - the manual alignment setup using *T. elongatus*; the far-right panel – dispensed *Phormidium* cell suspension on paper.

## Supplementary Figure 4

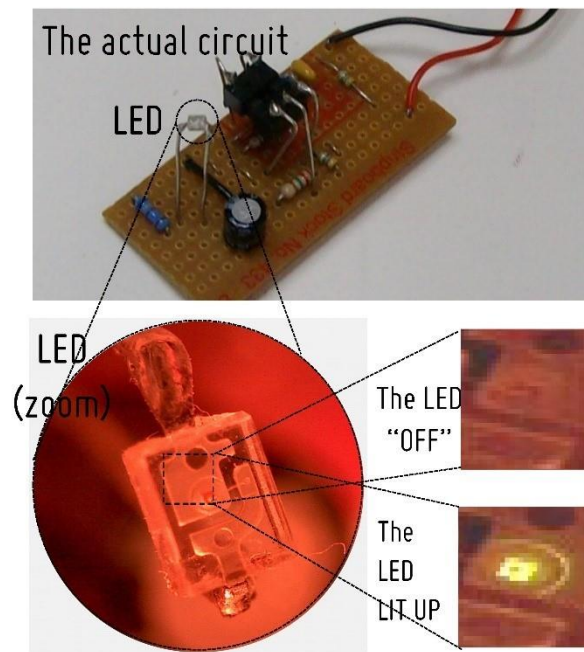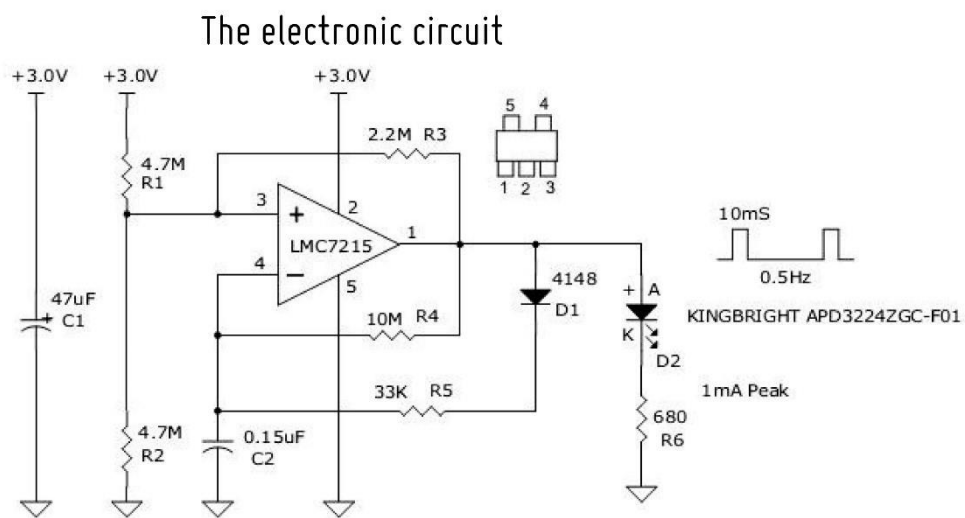

LED circuit. Photograph of the circuit (upper panel) and the electronic circuit diagram (lower panel).



## Supplementary Figure 5

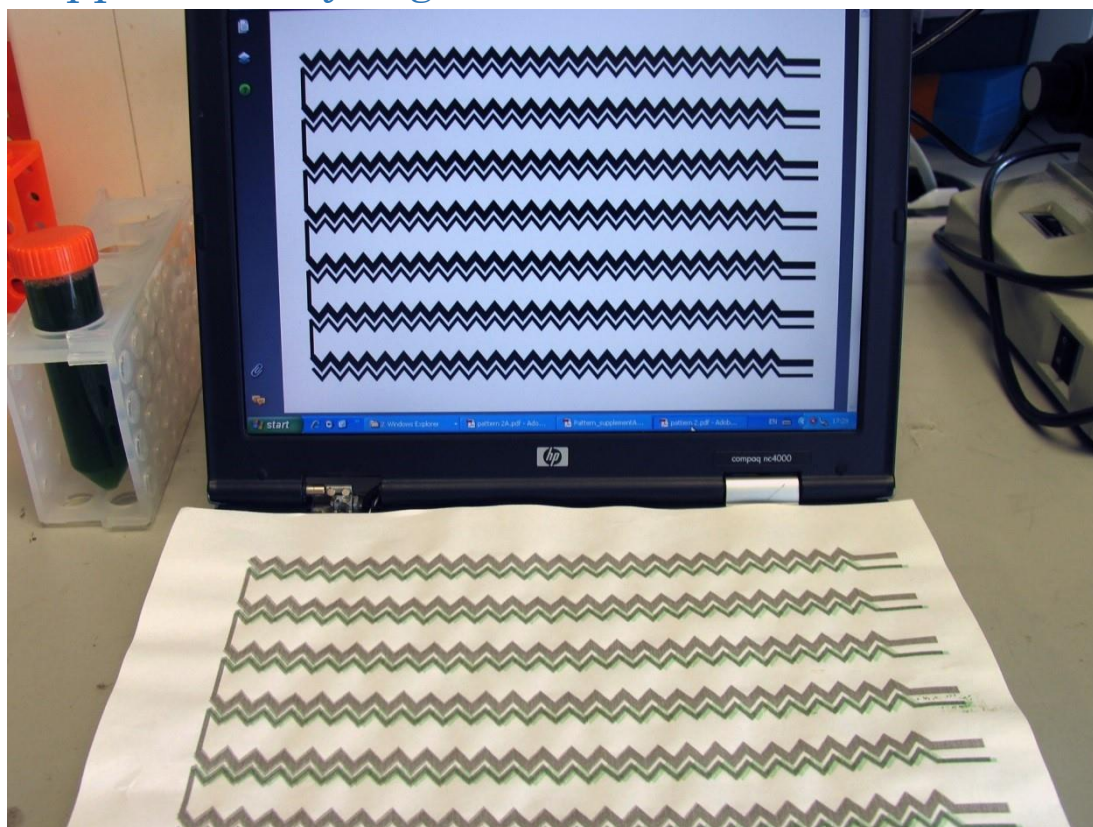

Printing of an A4-size fully printed BPV cell for bioenergy wall paper.

The panel shows a freshly printed A4-size BPV ‘paper’ containing zigzag electrodes in series, shown together with the computer-aided design file on the computer screen.

Green zigzag lines are anodes of printed *Synechocystis* cells on top of preprinted CNTs.

## Supplementary Figure 6

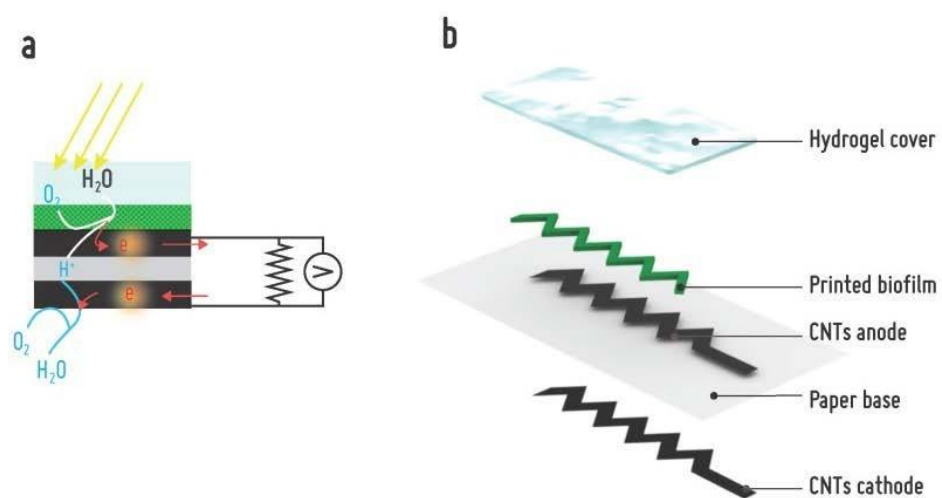

'Sandwich' design for the fully printed BPV device. Schematic representation of another system for the printed paper-based BPV cell in which the anode and cathode are back to back with the paper substrate in between (a). Expanded construct of the sandwich structure (b).

## Supplementary Table 1

ANOVA test of the numbers of colonies grown from the most diluted cell suspension taken before printing (mean 87.5, standard deviation 12.0, n=2) versus the number of colonies grown from the most diluted cell suspension taken after printing (mean 90.5, standard deviation 10.6, n=2).

|          | SS    | df | MS    | F     | p     |
|----------|-------|----|-------|-------|-------|
| Between: | 9.000 | 1  | 9.000 | 0.071 | 0.815 |
| Within:  | 254.3 | 2  | 127.2 |       |       |
| Total:   | 263.3 | 3  |       |       |       |

SS: sums of squares; df: degrees of freedom; MS: mean squares; F: F-value; p: *p*-value

## Supplementary Table 2

ANOVA test of the anodic peak power output produced by printed cells in the dark (mean 0.22 mW m<sup>-2</sup>, standard deviation 0.07 mW m<sup>-2</sup>, n=9) and printed cells in the light (0.34 mW m<sup>-2</sup>, standard deviation 0.07 mW m<sup>-2</sup>, n=9).

|          | SS    | df | MS    | F      | p       |
|----------|-------|----|-------|--------|---------|
| Between: | 0.115 | 1  | 0.115 | 23.510 | <0.0005 |
| Within:  | 0.078 | 16 | 0.005 |        |         |
| Total:   | 0.194 | 17 |       |        |         |

SS: sums of squares; df: degrees of freedom; MS: mean squares; F: F-value; p: *p*-value

### Supplementary Table 3

ANOVA test of the anodic peak power output for printed cells in the dark (mean  $0.22 \text{ mW m}^{-2}$ , standard deviation  $0.07 \text{ mW m}^{-2}$ ,  $n=9$ ) and the negative control (i.e., the bare printed anode) in the dark (mean  $0.07 \text{ mW m}^{-2}$ , standard deviation  $0.01 \text{ mW m}^{-2}$ ,  $n=3$ ).

|          | SS    | df | MS    | F      | p     |
|----------|-------|----|-------|--------|-------|
| Between: | 0.051 | 1  | 0.051 | 14.849 | 0.005 |
| Within:  | 0.039 | 10 | 0.004 |        |       |
| Total:   | 0.090 | 11 |       |        |       |

SS: sums of squares; df: degrees of freedom; MS: mean squares; F: F-value; p: *p*-value
